# Supplementary material
Source: PubMed Central journal article supplement (PMC2575324)
Supplement: 0801763105_0801763105SI.pdf [file 0801763105_0801763105SI.pdf]

# Supporting Information

Gratton et al. 10.1073/pnas.0801763105

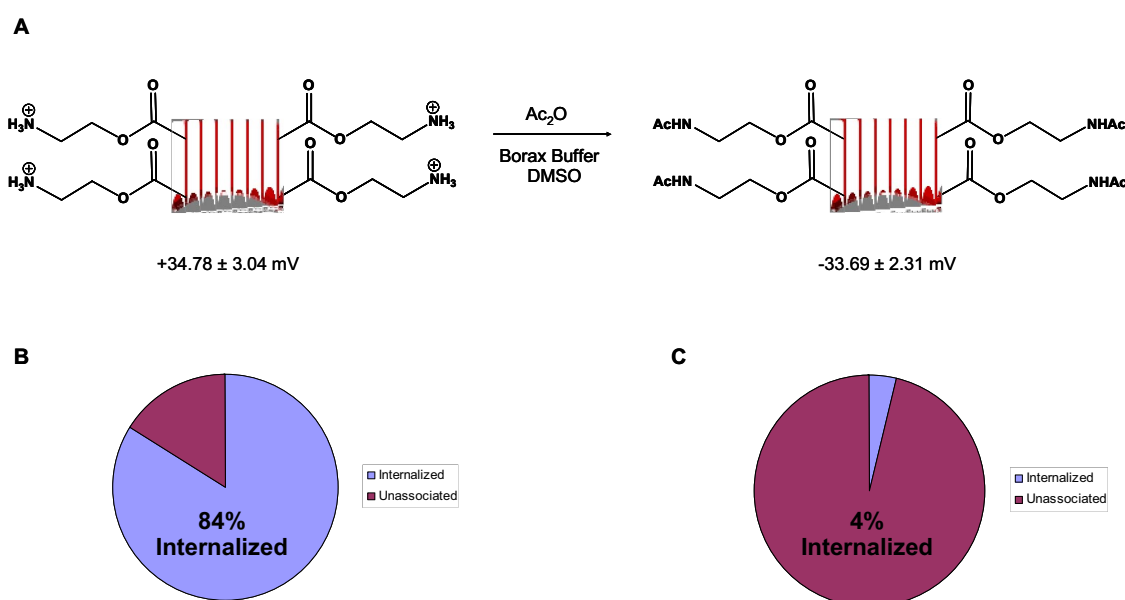

**Fig. S1.** Effect of charge on cellular internalization. (A) The chemical transformation, leading to changes in surface charge. (B) Particle internalization after 4 h of incubation with HeLa cells with *positively* charged particles. (C) Particle internalization after 4 h of incubation with HeLa cells with *negatively* charged particles.

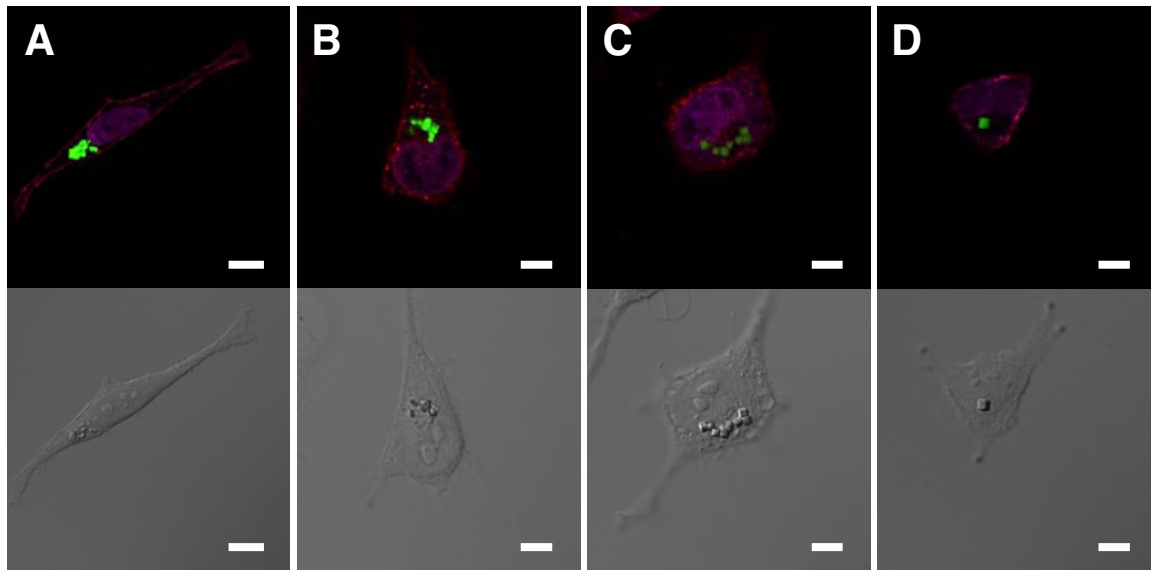

**Fig. S2.** Confocal laser scanning microscopy images of HeLa cells after a 1-h incubation period at 37°C with 200-nm cylindrical particles (A), 1- $\mu$ m cylindrical particles (AR = 1) (B), 2- $\mu$ m cubic particles (C), and 3- $\mu$ m cubic particles (D) (scale bar: 10  $\mu$ m.)

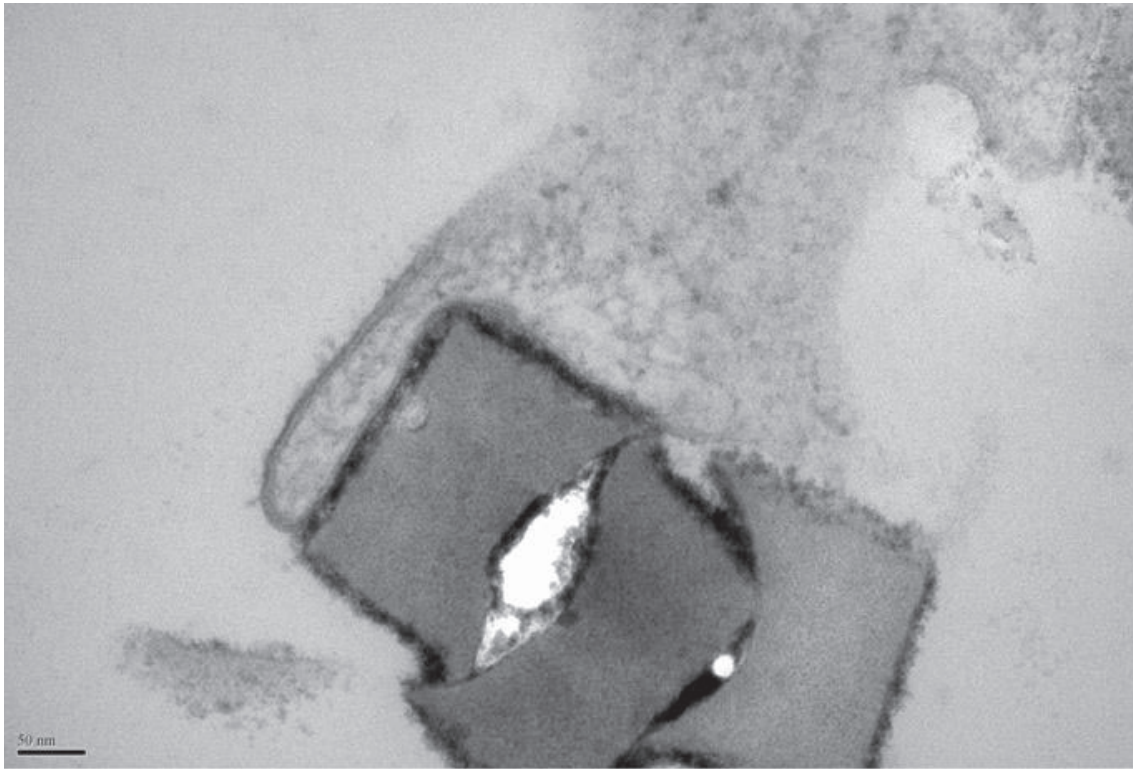

**Fig. S3.** Transmission electron microscopy image of HeLa cells at 37°C incubated with 200 nm ( $AR = 1$ ) cylindrical particles (15-min incubation time).

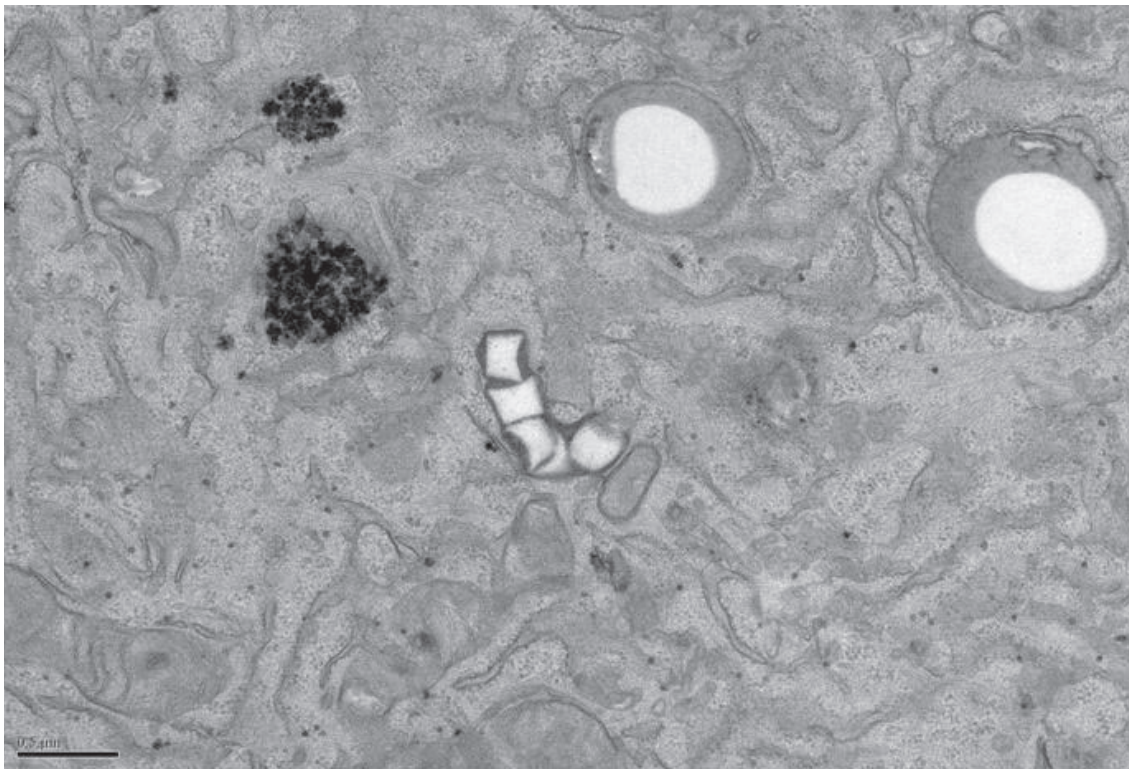

**Fig. S4.** Transmission electron microscopy image of HeLa cells at 37°C incubated with 200-nm ( $AR = 1$ ) cylindrical particles (4-h incubation time).

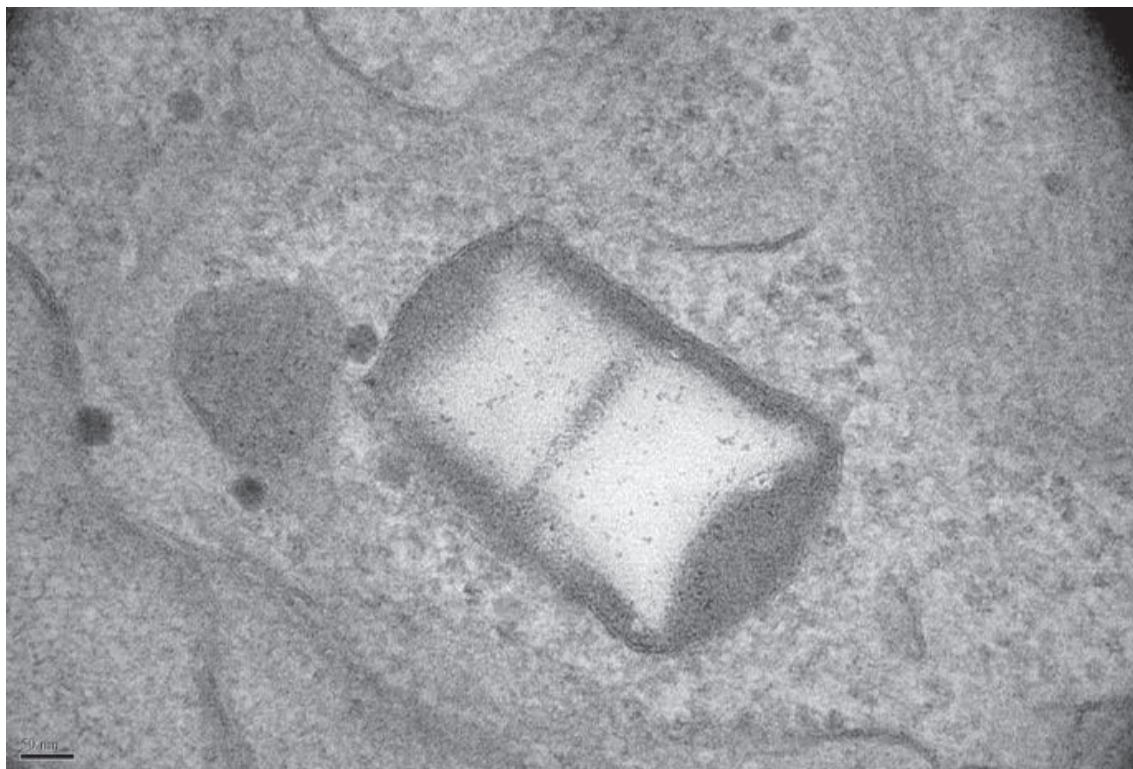

**Fig. S5.** Transmission electron microscopy image of HeLa cells at 37°C incubated with 200-nm ( $AR = 1$ ) cylindrical particles (4-h incubation time).

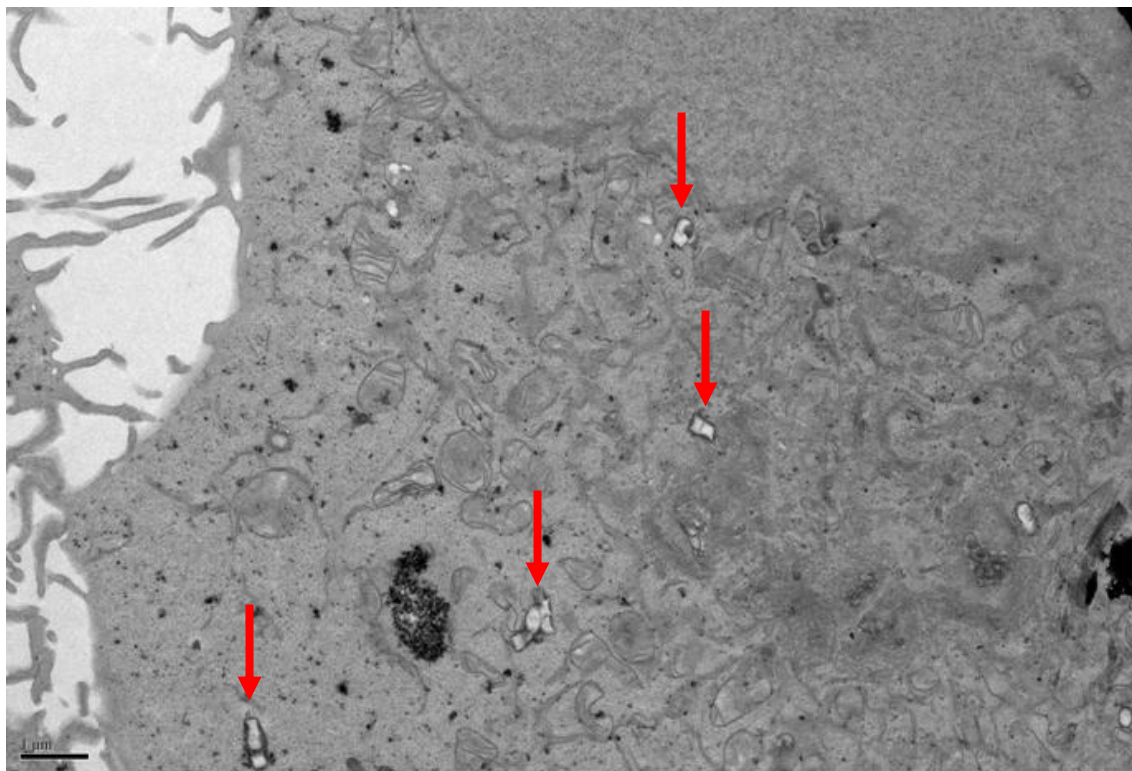

**Fig. S6.** Transmission electron microscopy image of HeLa cells at 37°C incubated with 200-nm ( $AR = 1$ ) cylindrical particles (4-h incubation time). Red arrows depict particle location.

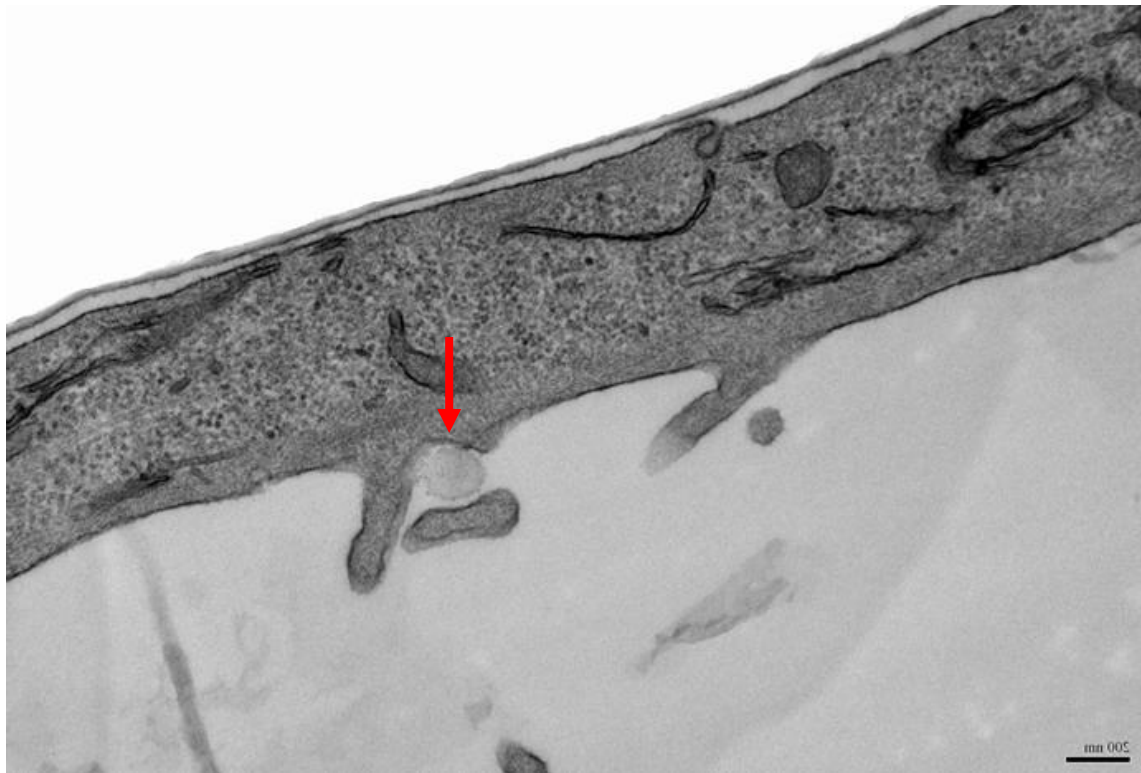

**Fig. S7.** Transmission electron microscopy image of HeLa cells at 37°C incubated with 150-nm (AR = 3) cylindrical particles (1-h incubation time). Red arrow depicts particle location.

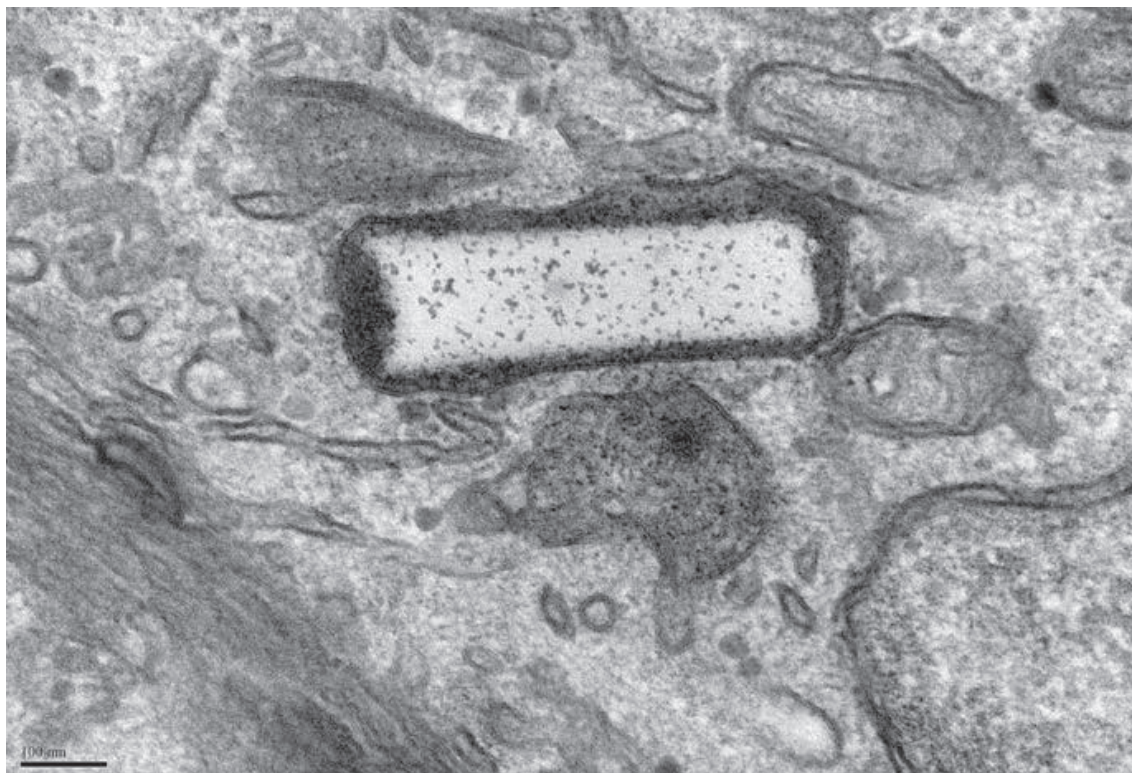

**Fig. S8.** Transmission electron microscopy image of HeLa cells at 37°C incubated with 150-nm ( $AR = 3$ ) cylindrical particles (1-h incubation time).

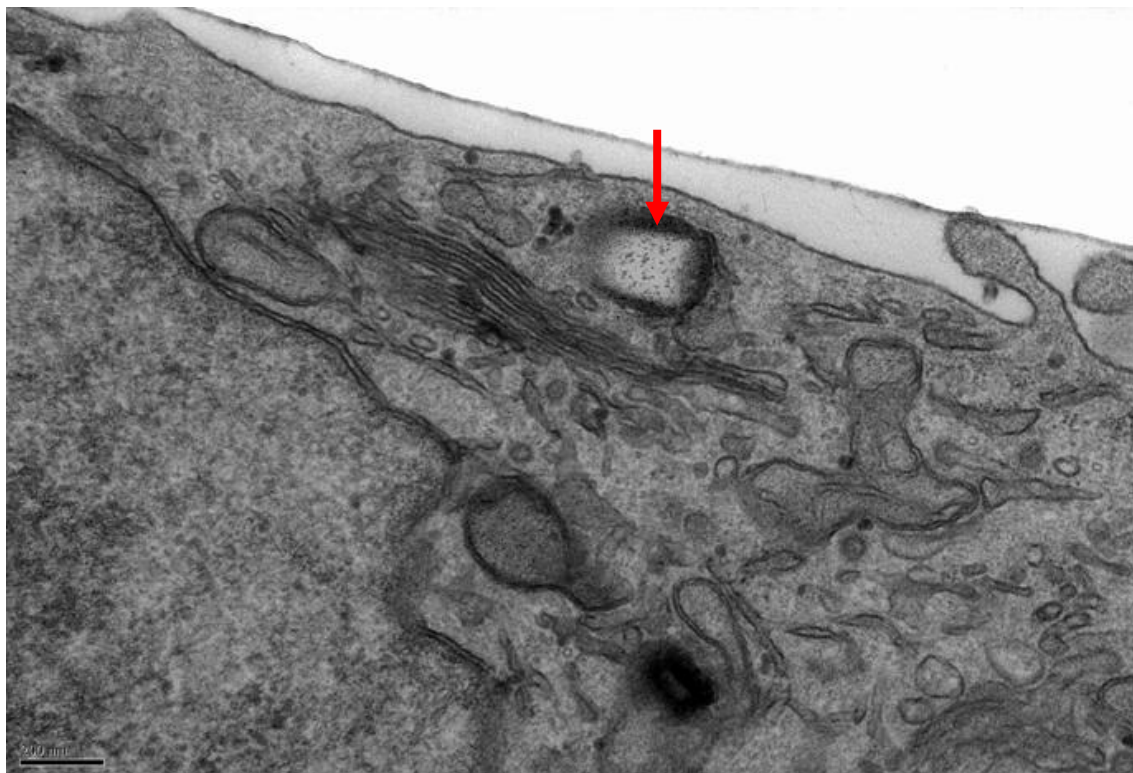

**Fig. S9.** Transmission electron microscopy image of HeLa cells at 37°C incubated with 150-nm (AR = 3) cylindrical particles (4-h incubation time). Red arrow depicts particle location.

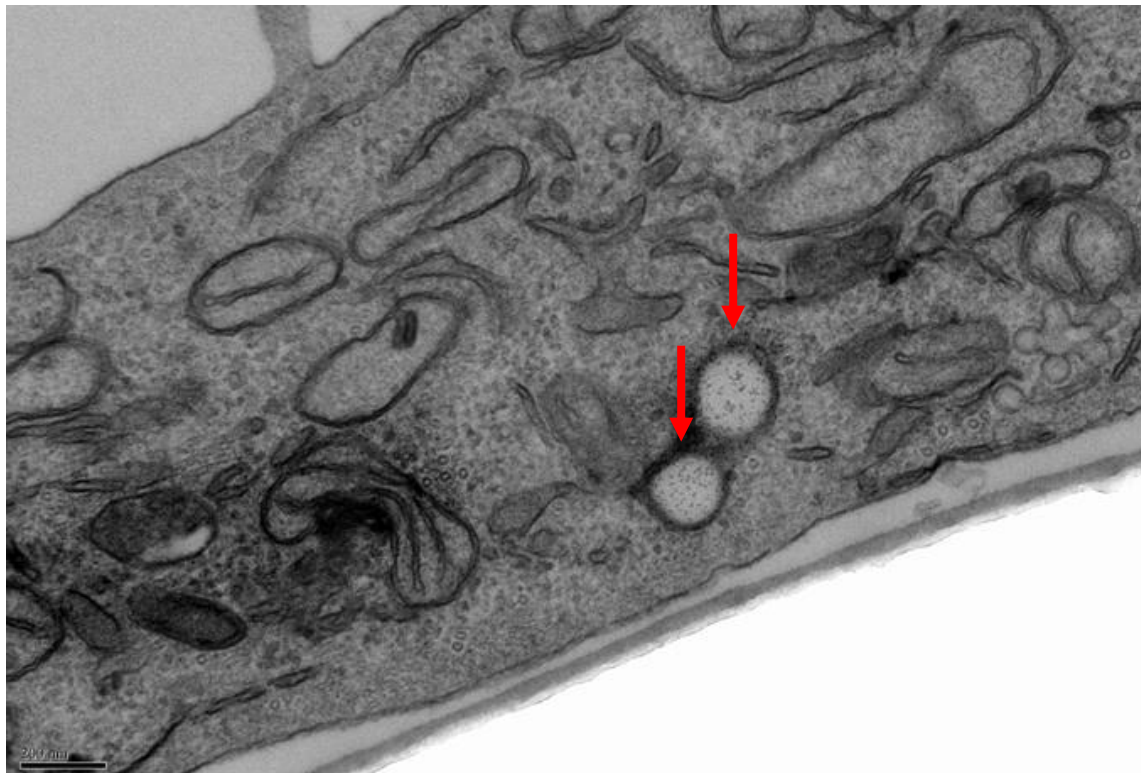

**Fig. S10.** Transmission electron microscopy image of HeLa cells at 37°C incubated with 150-nm (AR = 3) cylindrical particles (4-h incubation time). Red arrow depicts particle location.

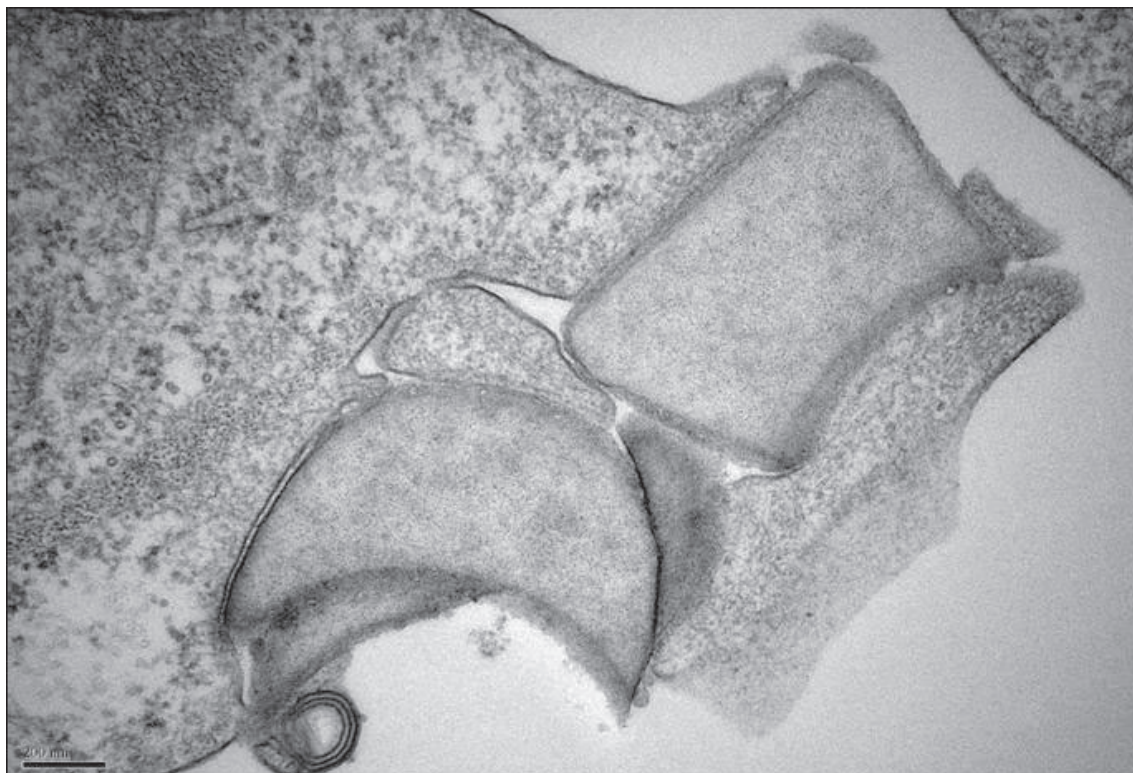

**Fig. S11.** Transmission electron microscopy image of HeLa cells at 37°C incubated with 1- $\mu$ m (AR = 1) cylindrical particles (1-h incubation time).

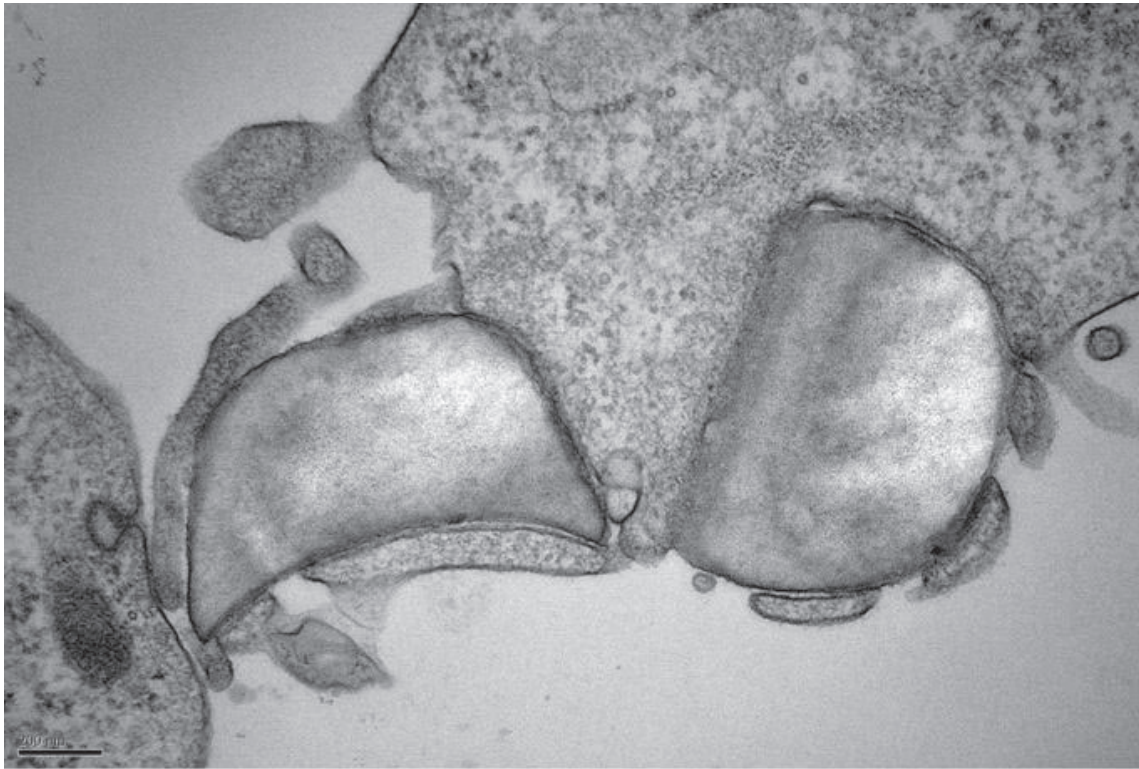

**Fig. S12.** Transmission electron microscopy image of HeLa cells at 37°C incubated with 1- $\mu$ m (AR = 1) cylindrical particles (1-h incubation time).

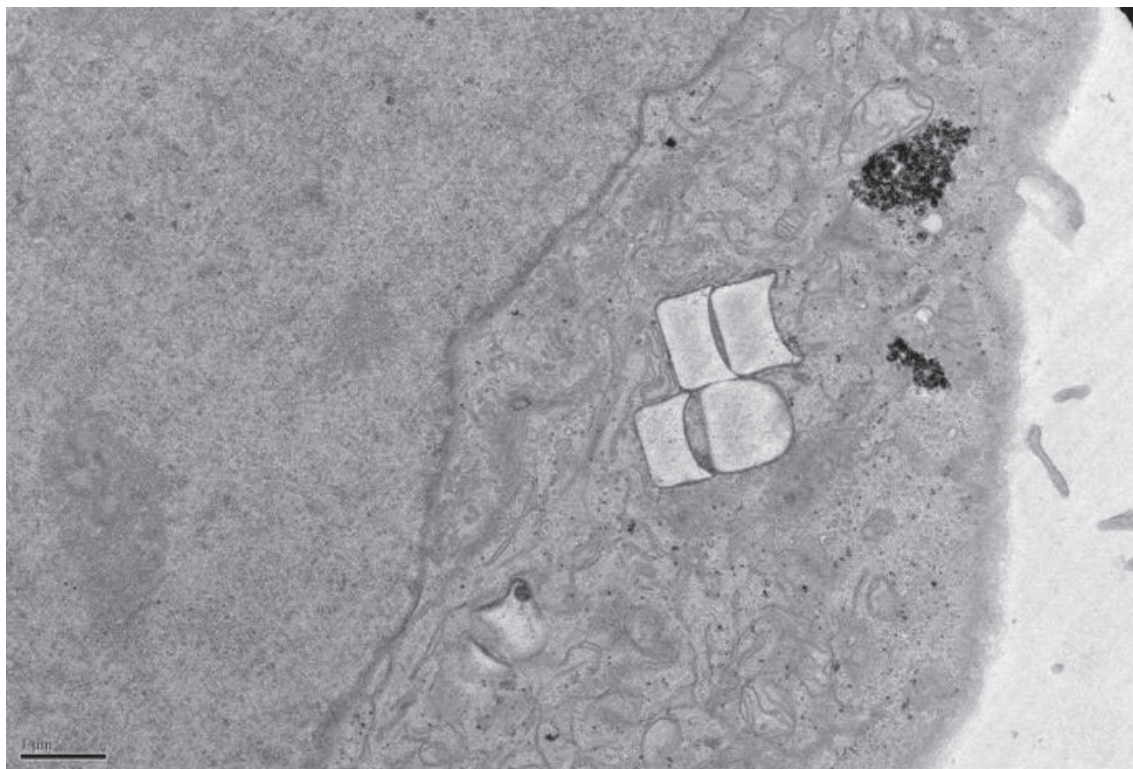

**Fig. S13.** Transmission electron microscopy image of HeLa cells at 37°C incubated with 1- $\mu$ m (AR = 1) cylindrical particles (4-h incubation time).

**Table S1. Particle size characterization as determined by scanning electron microscopy measurements**

| Particle size                          | Height, $\mu\text{m}$ | Width, $\mu\text{m}$       |
|----------------------------------------|-----------------------|----------------------------|
| 5- $\mu\text{m}$ cubes                 | $4.60 \pm 0.07$       | $4.67 \pm 0.20$            |
| 3- $\mu\text{m}$ cubes                 | $2.50 \pm 0.10$       | $2.63 \pm 0.09$            |
| 2- $\mu\text{m}$ cubes                 | $1.56 \pm 0.09$       | $1.86 \pm 0.04$            |
| 1- $\mu\text{m}$ cylinders (AR = 1)    | $0.58 \pm 0.05$       | $0.90 \pm 0.01$            |
| 0.5- $\mu\text{m}$ cylinders (AR = 2)  | $0.38 \pm 0.02$       | $0.77 \pm 0.09$            |
| 0.2- $\mu\text{m}$ cylinders (AR = 1)  | $0.217 \pm 0.006$     | $0.159 \pm 0.007$          |
| 0.15- $\mu\text{m}$ cylinders (AR = 3) | $0.479 \pm 0.026$     | $0.134 \pm 0.026$ (top)    |
|                                        |                       | $0.159 \pm 0.012$ (bottom) |
| 0.1- $\mu\text{m}$ cylinders (AR = 3)  | $0.277 \pm 0.014$     | $0.075 \pm 0.003$ (top)    |
|                                        |                       | $0.118 \pm 0.005$ (bottom) |

Particle labels describe master cavity size.

**Table S2. Characterization of the surface charge of PRINT particles**

| Particle size                          | Zeta potential, mV |
|----------------------------------------|--------------------|
| 5- $\mu\text{m}$ cubes                 | +26 $\pm$ 3        |
| 3- $\mu\text{m}$ cubes                 | +21 $\pm$ 3        |
| 2- $\mu\text{m}$ cubes                 | +21 $\pm$ 3        |
| 1- $\mu\text{m}$ cylinders (AR = 1)    | +22 $\pm$ 3        |
| 0.5- $\mu\text{m}$ cylinders (AR = 2)  | +32 $\pm$ 3        |
| 0.2- $\mu\text{m}$ cylinders (AR = 1)  | +42 $\pm$ 3        |
| 0.15- $\mu\text{m}$ cylinders (AR = 3) | +35 $\pm$ 3        |
| 0.1- $\mu\text{m}$ cylinders (AR = 3)  | +41 $\pm$ 3        |
